# Supplementary material for: Appraising the causal association between Crohn’s disease and breast cancer: a Mendelian randomization study
Source: Front Oncol. 2024 Feb 9;13:1275913. doi: 10.3389/fonc.2023.1275913 (PMC10884953; doi:10.3389/fonc.2023.1275913)
Supplement: Supplementary file 1 [file DataSheet_1.xlsx]

## Sheet: Sheet1
	SNP	effect_allele	other_allele	pval.exposure	beta.exposure	se.exposure	eaf.exposure	samplesize.exposure	F-statistic	outcome
1	rs1056441	C	T	5.44e-11	0.167	0.0255	0.697697	20883	42.8897	overall breast cancer
2	rs10761659	G	A	3.42e-19	0.212006	0.0237	0.55269	20883	80.0202	overall breast cancer
3	rs11209026	A	G	1.05e-54	-0.995199	0.0639	0.0563213	20883	242.559	overall breast cancer
4	rs11236797	A	C	4.85e-15	0.181104	0.0231	0.473264	20883	61.4656	overall breast cancer
5	rs112401990	A	G	2.35e-08	0.132203	0.0237	0.373412	20883	31.1162	overall breast cancer
6	rs114607072	T	G	2.2e-12	0.441797	0.0629	0.0402795	20883	49.3338	overall breast cancer
7	rs1250573	A	G	9.01e-11	-0.170895	0.0264	0.287447	20883	41.9036	overall breast cancer
8	rs12717899	T	G	3.59e-08	0.159198	0.0289	0.793845	20883	30.3445	overall breast cancer
9	rs1297271	T	C	6.28e-11	-0.154901	0.0237	0.429877	20883	42.7181	overall breast cancer
10	rs13135092	G	A	1.21e-08	0.221495	0.0389	0.095419	20883	32.4212	overall breast cancer
11	rs1332099	C	T	4.36e-20	-0.211597	0.0231	0.515025	20883	83.9064	overall breast cancer
12	rs140054334	T	C	2.57e-08	0.349797	0.0628	0.038307	20883	31.0251	overall breast cancer
13	rs1456896	T	C	2.9e-08	0.139301	0.0251	0.697556	20883	30.8007	overall breast cancer
14	rs147018773	T	C	8.89e-18	0.321699	0.0375	0.0966978	20883	73.5931	overall breast cancer
15	rs147684209	C	T	2.34e-10	0.154901	0.0244	0.369415	20883	40.3022	overall breast cancer
16	rs148844907	A	T	1.47e-11	0.958001	0.1419	0.00828273	20883	45.5792	overall breast cancer
17	rs151314883	A	G	7.12e-12	-0.223994	0.0327	0.157585	20883	46.9221	overall breast cancer
18	rs1887428	C	G	4.22e-12	-0.168099	0.0243	0.623303	20883	47.8539	overall breast cancer
19	rs1932990	T	C	6.02e-09	0.152901	0.0263	0.253841	20883	33.7994	overall breast cancer
20	rs2076756	G	A	3.24e-61	0.399806	0.0242	0.283672	20883	272.94	overall breast cancer
21	rs2129944	G	T	7.81e-09	-0.1562	0.0271	0.291299	20883	33.2218	overall breast cancer
22	rs2505640	G	A	7.61e-10	-0.145701	0.0237	0.643588	20883	37.7945	overall breast cancer
23	rs281379	A	G	4.26e-09	0.139797	0.0238	0.489275	20883	34.5018	overall breast cancer
24	rs28701841	A	G	1.85e-09	0.224303	0.0373	0.116563	20883	36.162	overall breast cancer
25	rs3024505	A	G	3.9e-09	0.177903	0.0302	0.16156	20883	34.7019	overall breast cancer
26	rs3810936	C	T	2.46e-15	0.207799	0.0263	0.698408	20883	62.4274	overall breast cancer
27	rs4077515	T	C	4.37e-20	0.215901	0.0235	0.419834	20883	84.4061	overall breast cancer
28	rs444210	G	A	1.02e-12	0.163402	0.0229	0.546838	20883	50.9148	overall breast cancer
29	rs4851586	C	T	9.94e-11	-0.168899	0.0261	0.759729	20883	41.8768	overall breast cancer
30	rs4902642	A	G	4.34e-08	-0.129198	0.0236	0.409159	20883	29.9701	overall breast cancer
31	rs4921497	G	C	5.49e-11	0.160298	0.0244	0.329415	20883	43.1595	overall breast cancer
32	rs56062135	T	C	7.45e-13	0.193097	0.0269	0.234271	20883	51.5284	overall breast cancer
33	rs6588243	C	A	1.78e-08	0.131704	0.0234	0.589982	20883	31.6786	overall breast cancer
34	rs6704109	T	C	2.77e-15	0.202002	0.0256	0.256123	20883	62.2632	overall breast cancer
35	rs6873866	C	T	2.06e-12	-0.168096	0.0239	0.534873	20883	49.4674	overall breast cancer
36	rs697693	A	G	8.36e-10	0.172296	0.0281	0.201415	20883	37.5957	overall breast cancer
37	rs7276302	G	A	1.23e-13	-0.171598	0.0231	0.608306	20883	55.1824	overall breast cancer
38	rs72798422	C	T	3.19e-31	0.590392	0.0508	0.047701	20883	135.068	overall breast cancer
39	rs744166	G	A	2.92e-08	-0.129299	0.0233	0.408159	20883	30.7949	overall breast cancer
40	rs7713270	T	C	6.97e-35	0.296602	0.0241	0.623824	20883	151.466	overall breast cancer
41	rs78487399	C	G	1.03e-09	0.2259	0.037	0.100704	20883	37.276	overall breast cancer
42	rs80262450	A	G	1.08e-15	0.283102	0.0353	0.112701	20883	64.3186	overall breast cancer
43	rs8137950	C	T	1.17e-09	0.173996	0.0286	0.199556	20883	37.0123	overall breast cancer
44	rs8178977	C	G	2.06e-12	0.1928	0.0274	0.238841	20883	49.5123	overall breast cancer
45	rs907092	A	G	1.01e-08	0.130396	0.0228	0.471412	20883	32.7084	overall breast cancer
46	rs921720	G	A	6.4e-12	0.162895	0.0237	0.618841	20883	47.241	overall breast cancer
1	rs1056441	C	T	5.44e-11	0.167	0.0255	0.697697	20883	42.8897	ER+ breast cancer
2	rs10761659	G	A	3.42e-19	0.212006	0.0237	0.55269	20883	80.0202	ER+ breast cancer
3	rs11209026	A	G	1.05e-54	-0.995199	0.0639	0.0563213	20883	242.559	ER+ breast cancer
4	rs11236797	A	C	4.85e-15	0.181104	0.0231	0.473264	20883	61.4656	ER+ breast cancer
5	rs112401990	A	G	2.35e-08	0.132203	0.0237	0.373412	20883	31.1162	ER+ breast cancer
6	rs114607072	T	G	2.2e-12	0.441797	0.0629	0.0402795	20883	49.3338	ER+ breast cancer
7	rs1250573	A	G	9.01e-11	-0.170895	0.0264	0.287447	20883	41.9036	ER+ breast cancer
8	rs12717899	T	G	3.59e-08	0.159198	0.0289	0.793845	20883	30.3445	ER+ breast cancer
9	rs1297271	T	C	6.28e-11	-0.154901	0.0237	0.429877	20883	42.7181	ER+ breast cancer
10	rs13135092	G	A	1.21e-08	0.221495	0.0389	0.095419	20883	32.4212	ER+ breast cancer
11	rs1332099	C	T	4.36e-20	-0.211597	0.0231	0.515025	20883	83.9064	ER+ breast cancer
12	rs140054334	T	C	2.57e-08	0.349797	0.0628	0.038307	20883	31.0251	ER+ breast cancer
13	rs1456896	T	C	2.9e-08	0.139301	0.0251	0.697556	20883	30.8007	ER+ breast cancer
14	rs147018773	T	C	8.89e-18	0.321699	0.0375	0.0966978	20883	73.5931	ER+ breast cancer
15	rs147684209	C	T	2.34e-10	0.154901	0.0244	0.369415	20883	40.3022	ER+ breast cancer
16	rs148844907	A	T	1.47e-11	0.958001	0.1419	0.00828273	20883	45.5792	ER+ breast cancer
17	rs151314883	A	G	7.12e-12	-0.223994	0.0327	0.157585	20883	46.9221	ER+ breast cancer
18	rs1887428	C	G	4.22e-12	-0.168099	0.0243	0.623303	20883	47.8539	ER+ breast cancer
19	rs1932990	T	C	6.02e-09	0.152901	0.0263	0.253841	20883	33.7994	ER+ breast cancer
20	rs2076756	G	A	3.24e-61	0.399806	0.0242	0.283672	20883	272.94	ER+ breast cancer
21	rs2129944	G	T	7.81e-09	-0.1562	0.0271	0.291299	20883	33.2218	ER+ breast cancer
22	rs2505640	G	A	7.61e-10	-0.145701	0.0237	0.643588	20883	37.7945	ER+ breast cancer
23	rs281379	A	G	4.26e-09	0.139797	0.0238	0.489275	20883	34.5018	ER+ breast cancer
24	rs28701841	A	G	1.85e-09	0.224303	0.0373	0.116563	20883	36.162	ER+ breast cancer
25	rs3024505	A	G	3.9e-09	0.177903	0.0302	0.16156	20883	34.7019	ER+ breast cancer
26	rs3091315	G	A	9.52e-12	-0.179501	0.0263	0.265588	20883	46.5824	ER+ breast cancer
27	rs3810936	C	T	2.46e-15	0.207799	0.0263	0.698408	20883	62.4274	ER+ breast cancer
28	rs4077515	T	C	4.37e-20	0.215901	0.0235	0.419834	20883	84.4061	ER+ breast cancer
29	rs444210	G	A	1.02e-12	0.163402	0.0229	0.546838	20883	50.9148	ER+ breast cancer
30	rs4851586	C	T	9.94e-11	-0.168899	0.0261	0.759729	20883	41.8768	ER+ breast cancer
31	rs4902642	A	G	4.34e-08	-0.129198	0.0236	0.409159	20883	29.9701	ER+ breast cancer
32	rs4921497	G	C	5.49e-11	0.160298	0.0244	0.329415	20883	43.1595	ER+ breast cancer
33	rs56062135	T	C	7.45e-13	0.193097	0.0269	0.234271	20883	51.5284	ER+ breast cancer
34	rs6588243	C	A	1.78e-08	0.131704	0.0234	0.589982	20883	31.6786	ER+ breast cancer
35	rs6704109	T	C	2.77e-15	0.202002	0.0256	0.256123	20883	62.2632	ER+ breast cancer
36	rs6873866	C	T	2.06e-12	-0.168096	0.0239	0.534873	20883	49.4674	ER+ breast cancer
37	rs697693	A	G	8.36e-10	0.172296	0.0281	0.201415	20883	37.5957	ER+ breast cancer
38	rs7276302	G	A	1.23e-13	-0.171598	0.0231	0.608306	20883	55.1824	ER+ breast cancer
39	rs72798422	C	T	3.19e-31	0.590392	0.0508	0.047701	20883	135.068	ER+ breast cancer
40	rs744166	G	A	2.92e-08	-0.129299	0.0233	0.408159	20883	30.7949	ER+ breast cancer
41	rs7713270	T	C	6.97e-35	0.296602	0.0241	0.623824	20883	151.466	ER+ breast cancer
42	rs78487399	C	G	1.03e-09	0.2259	0.037	0.100704	20883	37.276	ER+ breast cancer
43	rs80262450	A	G	1.08e-15	0.283102	0.0353	0.112701	20883	64.3186	ER+ breast cancer
44	rs8137950	C	T	1.17e-09	0.173996	0.0286	0.199556	20883	37.0123	ER+ breast cancer
45	rs8178977	C	G	2.06e-12	0.1928	0.0274	0.238841	20883	49.5123	ER+ breast cancer
46	rs907092	A	G	1.01e-08	0.130396	0.0228	0.471412	20883	32.7084	ER+ breast cancer
47	rs921720	G	A	6.4e-12	0.162895	0.0237	0.618841	20883	47.241	ER+ breast cancer
1	rs1056441	C	T	5.44e-11	0.167	0.0255	0.697697	20883	42.8897	ER- breast cancer
2	rs10761659	G	A	3.42e-19	0.212006	0.0237	0.55269	20883	80.0202	ER- breast cancer
3	rs11209026	A	G	1.05e-54	-0.995199	0.0639	0.0563213	20883	242.559	ER- breast cancer
4	rs11236797	A	C	4.85e-15	0.181104	0.0231	0.473264	20883	61.4656	ER- breast cancer
5	rs112401990	A	G	2.35e-08	0.132203	0.0237	0.373412	20883	31.1162	ER- breast cancer
6	rs114607072	T	G	2.2e-12	0.441797	0.0629	0.0402795	20883	49.3338	ER- breast cancer
7	rs12194825	A	T	8e-09	-0.171904	0.0298	0.18587	20883	33.2766	ER- breast cancer
8	rs1250573	A	G	9.01e-11	-0.170895	0.0264	0.287447	20883	41.9036	ER- breast cancer
9	rs12717899	T	G	3.59e-08	0.159198	0.0289	0.793845	20883	30.3445	ER- breast cancer
10	rs1297271	T	C	6.28e-11	-0.154901	0.0237	0.429877	20883	42.7181	ER- breast cancer
11	rs13135092	G	A	1.21e-08	0.221495	0.0389	0.095419	20883	32.4212	ER- breast cancer
12	rs1332099	C	T	4.36e-20	-0.211597	0.0231	0.515025	20883	83.9064	ER- breast cancer
13	rs140054334	T	C	2.57e-08	0.349797	0.0628	0.038307	20883	31.0251	ER- breast cancer
14	rs1456896	T	C	2.9e-08	0.139301	0.0251	0.697556	20883	30.8007	ER- breast cancer
15	rs147018773	T	C	8.89e-18	0.321699	0.0375	0.0966978	20883	73.5931	ER- breast cancer
16	rs147684209	C	T	2.34e-10	0.154901	0.0244	0.369415	20883	40.3022	ER- breast cancer
17	rs148844907	A	T	1.47e-11	0.958001	0.1419	0.00828273	20883	45.5792	ER- breast cancer
18	rs151314883	A	G	7.12e-12	-0.223994	0.0327	0.157585	20883	46.9221	ER- breast cancer
19	rs1887428	C	G	4.22e-12	-0.168099	0.0243	0.623303	20883	47.8539	ER- breast cancer
20	rs1932990	T	C	6.02e-09	0.152901	0.0263	0.253841	20883	33.7994	ER- breast cancer
21	rs2076756	G	A	3.24e-61	0.399806	0.0242	0.283672	20883	272.94	ER- breast cancer
22	rs2129944	G	T	7.81e-09	-0.1562	0.0271	0.291299	20883	33.2218	ER- breast cancer
23	rs2188962	T	C	1.36e-20	0.212398	0.0228	0.439546	20883	86.7823	ER- breast cancer
24	rs2505640	G	A	7.61e-10	-0.145701	0.0237	0.643588	20883	37.7945	ER- breast cancer
25	rs281379	A	G	4.26e-09	0.139797	0.0238	0.489275	20883	34.5018	ER- breast cancer
26	rs28701841	A	G	1.85e-09	0.224303	0.0373	0.116563	20883	36.162	ER- breast cancer
27	rs3024505	A	G	3.9e-09	0.177903	0.0302	0.16156	20883	34.7019	ER- breast cancer
28	rs3810936	C	T	2.46e-15	0.207799	0.0263	0.698408	20883	62.4274	ER- breast cancer
29	rs4077515	T	C	4.37e-20	0.215901	0.0235	0.419834	20883	84.4061	ER- breast cancer
30	rs444210	G	A	1.02e-12	0.163402	0.0229	0.546838	20883	50.9148	ER- breast cancer
31	rs4851586	C	T	9.94e-11	-0.168899	0.0261	0.759729	20883	41.8768	ER- breast cancer
32	rs4902642	A	G	4.34e-08	-0.129198	0.0236	0.409159	20883	29.9701	ER- breast cancer
33	rs4921497	G	C	5.49e-11	0.160298	0.0244	0.329415	20883	43.1595	ER- breast cancer
34	rs56062135	T	C	7.45e-13	0.193097	0.0269	0.234271	20883	51.5284	ER- breast cancer
35	rs6588243	C	A	1.78e-08	0.131704	0.0234	0.589982	20883	31.6786	ER- breast cancer
36	rs6704109	T	C	2.77e-15	0.202002	0.0256	0.256123	20883	62.2632	ER- breast cancer
37	rs6873866	C	T	2.06e-12	-0.168096	0.0239	0.534873	20883	49.4674	ER- breast cancer
38	rs697693	A	G	8.36e-10	0.172296	0.0281	0.201415	20883	37.5957	ER- breast cancer
39	rs7276302	G	A	1.23e-13	-0.171598	0.0231	0.608306	20883	55.1824	ER- breast cancer
40	rs72798422	C	T	3.19e-31	0.590392	0.0508	0.047701	20883	135.068	ER- breast cancer
41	rs744166	G	A	2.92e-08	-0.129299	0.0233	0.408159	20883	30.7949	ER- breast cancer
42	rs7543234	T	C	6.1e-09	0.155498	0.0267	0.238986	20883	33.9178	ER- breast cancer
43	rs7713270	T	C	6.97e-35	0.296602	0.0241	0.623824	20883	151.466	ER- breast cancer
44	rs78487399	C	G	1.03e-09	0.2259	0.037	0.100704	20883	37.276	ER- breast cancer
45	rs80262450	A	G	1.08e-15	0.283102	0.0353	0.112701	20883	64.3186	ER- breast cancer
46	rs8137950	C	T	1.17e-09	0.173996	0.0286	0.199556	20883	37.0123	ER- breast cancer
47	rs8178977	C	G	2.06e-12	0.1928	0.0274	0.238841	20883	49.5123	ER- breast cancer
48	rs907092	A	G	1.01e-08	0.130396	0.0228	0.471412	20883	32.7084	ER- breast cancer
49	rs921720	G	A	6.4e-12	0.162895	0.0237	0.618841	20883	47.241	ER- breast cancer
